# Supplementary material
Source: publisher site journal article supplement (https://static.cambridge.org/content/id/urn:cambridge.org:id:article:S2632324920000176/resource/name/S2632324920000176supp003.docx)
Supplement: Supplementary file 1 [file S2632324920000176supp003.docx]

Appendix 3. Neither migrant’s journey nor humanising migrants pro-immigration campaigns. Varied values-bases

| Name of the campaign | Support/format | Institution | Country | Link | Brief summary | Values-basis |
| --- | --- | --- | --- | --- | --- | --- |
| La Caravane des sans-papiers (The caravan of undocumented migrants) | Discussions/Exchanges | CIRE asbl (Coordination et Initiatives pour Réfugiés et Étrangers) | Belgium | <https://www.youtube.com/watch?v=ZbazU9cRI10> | The Caravan goes to various cities and towns, to meet people and have exchanges on migration. At each of its stops, the Caravan takes the time to meet with citizens with and without papers, associations and unions, secondary schools and universities, local authorities, and to exchange with them. These meeting are an opportunity for undocumented migrants to testify of their realities and challenges but also to hear those of their interlocutors. It allows to deconstruct prejudices that circulate widely in their regard and to show that the social struggles of each other are ultimately closely linked. | universalism / benevolence |
| Les cahiers du FTDES: Cahier migration (FTDES's handbooks : Migration) | Handbook | FTDES | Tunisia | <https://ftdes.net/rapports/cahiermigration.pdf> | Periodical publication about migration-related issues presenting facts, figures and analysis advocating for respect of human rights at national and international llevels | n/a |
| Migrations Partageons nos Richesses | Movie, Play, Exhibition | Conseil départemental du Val-de-Marne en partenariat avec l’association FORIM | France | <https://www.valdemarne.fr/espace-presse/les-communiques-de-presse/lancement-de-la-campagne-migrations-partageons-nos-richesses> | Le Département propose aux associations et membres du réseau « Migrations citoyenneté » un outil d’animation et de sensibilisation visant à lutter contre la résurgence des préjugés, le repli sur soi et les discriminations. Cette initiative répond aux ambitions d'utilité, de solidarité et d'innovation du Département en renforçant le lien social entre les populations et en améliorant la compréhension et le respect mutuel entre les individus. A travers cette initiative, le Département réaffirme sa volonté de sensibiliser aux enjeux des migrations, de lutter contre les préjugés et de mettre en exergue la solidarité internationale. | universalism / benevolence |
| Save Me | Petition, Social media, Play | Bavarian Refugee Council, Munich Refugee Council, Münchner Kammerspiele, Refugio | Germany | <http://www.save-me-muenchen.de/de/> | The campaign grew from a play about winning a ticket to Europe. The campaigners used social media and set up a website with a petition for members of the public to sign, with a photo of themselves and a comment showing their solidarity with the 'Save Me' campaign and the resettlement of refugees to Germany. | universalism / benevolence |
| Campagne Musée de l’Histoire de l’Immigration | Photos | Musée National de l’Histoire de l’Immigration | France | <http://www.histoire-immigration.fr/nouvelle-campagne-de-communication> | Le Musée national de l’histoire de l’immigration lance une campagne de communication tournée vers le grand public. À travers des messages qui interpellent le grand public, avec une approche simple, directe et humoristique, cette campagne entend rappeler que l’histoire de l’immigration est l’histoire de tous, et fait partie de l’histoire de la France. La campagne se veut factuelle. Elle montre des photographies historiques, scènes de voyage, de travail, de vie, toutes issues des collections permanentes du Musée. | n/a |
| Flight Control - Minority Radio Show | Radio | Študent Radio (one of the oldest independent and non-commercial radio in Europe) | Slovenia | <https://www.clarinetproject.eu/nominee/flight-control-minority-radio-show/> | Since 2012, the Flight Control radio show promotes critical dialogue between cultures in Southeastern Europe. It spreads information on the progressive, alternative and underground cultural scene of ex-Yugoslavia and supports open and critical views not based on stereotypes and mainstream representations. Flight Control also covers issues faced by minorities and migrants to emphasize their rights in the Slovenian society. On Sundays, Flight Control is on air on the Študent Radio, one of the oldest independent and non-commercial radio in Europe. Flight Control emerges under the auspices of the Serbian Cultural Center “Danilo Kiš” and is supported by the Ministry of Culture of the Republic of Serbia, the Office for Cooperation with the Diaspora and Serbs in the Region and the Ministry of Culture of the Republic of Slovenia. | universalism |
| Anti-Rumour campaign: “Do not allow rumors to get you sick. Get yourself vaccinated” | Roleplays, Leaflets | Island Council of Tenerife, Tenerife public hospital | Spain | <https://www.clarinetproject.eu/wp-content/uploads/2019/07/ANTI-RUMOURS-CAMPAIGN-min-1.pdf> | The campaign aimed to reduce rumors and prejudices, which are a burden upon migrants. It was implemented at the entrance of a hospital, where rumors that affirm that immigrants use abusively the health system are spread. The campaign consisted in raising awareness through a roleplaying simulating medical examination and a vaccination campaign. An “Anti-rumors vaccine” containing accurate data against these rumors in the prospectus was given to every health worker and the people walking around. | n/a |
| Xsellschaften - aus Gesellschaften eine Gesellschaft schaffen (Xsocieties - To form one society out of many societies) | Short film | Daheim in Telfs | Austria | <https://www.facebook.com/pg/Xsellschafften/about/?ref=page_internal> | Xsellschafften stands for the creation of ONE society in which diversity is valued and lived. Through short films we give an insight into life worlds that are often not perceived. We believe that togetherness is more meaningful, more beautiful and more enriching than togetherness in a world that is frightening. This is what we stand for, and this is why we do what we do. | universalism / benevolence |
| #Anturem Rumors (Anti-Rumours) | Social Media | Barcelona City Council | Spain | https://padlet.com/antirumors/AturemRumors | The campaign is one of the initiatives of the anti-rumours network established by the Barcelona City Council. It aims to respond to the rise of racist discourses that feed rumours, strengthen stereotypes and stir up fear and mistrust on social networks and among Barcelona’s residents. The campaign attempts to build new narratives starring activists and influencers from an intercultural and intersectional perspective, debunking discriminatory and racist rumours and stereotypes that affect on a differential basis racialised groups on the grounds of origins, religion, etc. | universalism |
| A Day Without Migrants | Social media | IOM Egypt | Egypt | <https://www.iom.int/news/iom-launches-day-without-migrants-social-media-campaign> | The Social media highlights the real and positive impacts that migrants have on the communities that host them and it seeks to start dialogue about the impact of migration that is centered on evidence and facts rather than propaganda. It also aims to highlight the importance of migration equally for the benefit of the migrants, the countries of origin and the countries of destination. | Power |
| #WithRefugees campaign | Social media, Petition | UNHCR | Global | <https://www.unhcr.org/withrefugees/> | Between 2016-18 UNHCR’s #WithRefugees campaign and petition mobilized the public, civil society and governments to take action by asking that every refugee child has access to education, every refugee family can find safe shelter and refugees can work or learn a skill to provide for their families. | universalism / benevolence |
| #No Walls But Bridges | Social media, Posters | B1-Akt, Ecole des Ponts Business School | France | <http://s230464179.onlinehome.fr/wp-content/uploads/2019/05/2019-05-23-Final-Report-Campaign-No-Walls-but-bridges-Migrant-Sustainable-Integration-Le-Guern-Petrache.pdf> | An international grassroot campaign and an open dialogue on social media on sustainable solutions for the integration of migrants, developed in the Migrant Integration Lab Device, a global mechanism for sustainable integration | universalism / benevolence |
| Everyday heroes from Syria | Social media, Video | European Commission's Humanitarian Aid and Civil Protection department (ECHO), Danish Refugee Council (DRC) | Global | <https://www.avrupa.info.tr/en/news/time-pay-tribute-everydayheroes-campaign-celebrates-individual-efforts-effect-change-1821> | The month-long online campaign brought out the untold stories of #everydayheroes living in countries neighbouring Syria, Lebanon, Turkey, Iraq, and Jordan, where nearly four million Syrian refugees have now sought refuge since the Syria crisis began in 2011. During this period, people were invited to post and share their everyday hero tales on social media outlets. | universalism / benevolence |
| Mi Impegno A Parma - L'Integrazione Vincente ( I am committed in Parma - the successfull integration) | Social media, Website | Comune di Parma | Italy | <https://www.clarinetproject.eu/nominee/mi-impegno-a-parma-lintegrazione-vincente/> | Mi Impegno a Parma is a project designed to boost solidarity by promoting civic engagement. Citizens get involved in their community by offering their time and skills for voluntary activities. The project has been crucial to improve social inclusion of migrants and asylum seekers in Parma. Many asylum seekers have been volunteering and today they are the most involved. Thanks to the project, we have stimulated mutual knowledge between native and foreign citizens as well as obtained the elements to talk with the city about the positive value of migration, thus building a more cohesive and inclusive society. | universalism / benevolence |
| Thank you Lithuania campaign | Video | Red Cross Lithuania | Lithuania | <https://www.youtube.com/watch?v=OKi7244M_po> ; <https://www.youtube.com/watch?v=pkW_RI8aEqU> | The video aims at thanking Lithuania for welcoming refugees. | Benevolence |
| #Do1Thing | Video | Jesuit Refugee Service (JRS) | Global | <https://jrs.net/campaign/do1thing/> | With the #Do1Thing campaign, JRS shows what individuals are doing to welcome, protect, promote, and integrate refugees in their communities. These are ordinary people, doing simple things: offering friendship, or helping with a language class. They are not engaged in many great and heroic acts, but often are just offering one thing, one form of support, one day in a week. | n/a |
| IBELONG | Video | UNHCR, UK Government | UK | <https://www.unhcr.org/ibelong/#section-openletter> | The #IBelong Campaign was launched by UNHCR in 2014 collaborating with States, civil society and other UN Agencies aiming to end statelessness by 2024 by resolving existing statelessness, preventing new cases from emerging and better identifying and protecting stateless populations. | universalism / benevolence |
| Inspiring Luxembourg | Video | [The Luxembourg Government](https://gouvernement.lu/en.html) | Luxembourg | <http://www.inspiringluxembourg.public.lu/en/index.html> | Luxembourg is at the heart of a multitude of cultural influences, partly because of its geography but also because of trade, industrialisation, and immigration. These promotional videos seek to present Luxembourg as an open, dynamic and tolerant country. | universalism / benevolence |
| Integration of Refugees in Germany | Video | Council of the EU | Germany | <https://www.youtube.com/watch?v=YWMEEF45mNM> | The video shows how integration takes place in German thanks to the work of volunteers who spend time in teaching language courses and give their time to support migrants in their every-day life. | n/a |
| Minding The Gap: Equality in Education | Video | Migrant Rights Centre Ireland (MRCI) | Ireland | <https://www.youtube.com/watch?v=7Sszyqlgk7g> | Gaps in education and immigration systems mean young migrants - who came to Ireland as children to join their non-EU parents - face enormous barriers to third level education. In this animated short video, the young members of MRCI's Migrant Education Access explain the issue and tell their stories. | universalism / benevolence |
| Campaign for the Right to Change Employer: The Experience of a Domestic Worker | Video | Migrant Rights Centre Ireland (MRCI) | Ireland | <https://www.youtube.com/watch?v=WJ15HwBI2Xo> | The MRCI is seeking an administrative change which would give people the freedom to exit exploitative conditions and find alternative work within their job category, without having to go through an entirely new permit application with its unnecessary costs and delays. | Benevolence |
| Aware | Video | Opinion & Action Services Ltd | Cyprus | http://cyprusaware.eu/en/our-campaign/ ; https://www.youtube.com/watch?v=2Ih9TX7vbXg ; https://www.youtube.com/watch?v=nuXtaEyLjZs ; https://www.youtube.com/watch?v=aGNYw735UVk | The Aware campaign's goal is to encourage social cohesion. With knowledge, information, contact, interaction, respect for identity and diversity, the campaign supports the efforts of the Cypriot State for migrants to access their rights without discrimination. It also supports a smooth integration into the host society within the broader European Union policy. | n/a |
| On Solid Ground | Video | EU Commission | EU | <https://ec.europa.eu/echo/node/505> | EU campaign on the occasion of World Refugee Day 2013: using the concept of home, On Solid Ground allowed audiences across Europe to connect with the issues faced by people hit by some of the most devastating humanitarian crises around the world through a captivating series of photographs. | universalism / benevolence |
| Fratelli di Sport | Video | CONI, Ministero del Lavoro e delle Politiche Sociali, Italian Government | Italy | http://www.fratellidisport.it/; https://www.youtube.com/watch?v=s-Iw1MY-fig | The campaign is aimed at favouring childrens' integration in host countries through sport, combating discrimination and intolerance. | universalism / benevolence |
| Giornata mondiale del migrante e del rifugiato 2018 | Video | Caritas Diocesana di Chioggia, Associazione Muraless, Chioggia Accoglie, e il progetto Intrecciati della Comunità Missionaria di Villaregia | Italy | <https://www.youtube.com/watch?v=5N1SCm1s9Vo> | Individuals describe why they are in favour of welcoming migrants and support integration in host countries, why welcoming, protecting, promoting and integrating refugees is so important for everybody. | universalism / benevolence |
| Migranti e Rifugiati | Video | Vatican Government, Dicastery for Integral Human Development, Migrants and Refugees Section | Vatican City | <https://www.youtube.com/watch?v=i4eOCOC8jek> | Pope Francis asks the world to welcome, protect, promote and integrate refugees and vulnerable migrants in our societies. | universalism / benevolence |
| Sport Brings People Together | Video | Kingdom of the Netherlands, Sports for Development and Peace (UN) | Netherlands | <https://www.youtube.com/watch?v=Pk9KMSXXeMo> | Sport brings people together. That's the motto the Netherlands has adopted for the soccer event it hosts on the balcony of the UN headquarters in New York on Thursday 16 June. The temporary 'Cruyff Court' that is set up honours the Netherlands' biggest soccer legend, Johan Cruyff. Various UN ambassadors stop by to take part in a mini-tournament. | universalism / benevolence |
| Stand Up 4 Migrants | Video | UN Human Rights Office of the High Commissioner | Global | <https://www.ohchr.org/en/issues/migration/pages/Videotories.aspx> | A series of animated Video to amplify the voices of migrants, the communities that welcome them and the conversations they have along the way | universalism / benevolence |
| What Excites Us, Unites Us | Video | Unicef | Global | <https://www.youtube.com/watch?v=V3ojxgJKfjs> | Santi, an 8-year-old boy who migrated from Bolivia to Spain, had trouble finding friends, and ultimately found acceptance in his new home country through a shared love of football. While playing, Santi and his friends are treated to a surprise visit from their hero, Sergio Ramos (Captain of the Spanish National Football Team and UNICEF ambassador).The campaign aims at demonstrating the power of football to help migrant and refugee children gain acceptance in their new home countries. | universalism / benevolence |
| Share the Journey Migration Campaign | Video, Global Solidarity Walk | Caritas International | Global | https://www.caritas.eu/pope-francis-to-call-on-everyone-to-share-the-journey-with-migrants/; http://journey.caritas.org/; https://www.youtube.com/watch?time_continue=4&v=zeH-tV83fZc | The two-year campaign of action and awareness-raising will promote the strengthening of relationships between migrants, refugees and communities. It is Caritas’ response to Pope Francis’ calls to promote the ‘culture of encounter’ – to see people on the move with humanity, to open hearts and minds, to change perceptions. | universalism / benevolence |
| شارك الصداقة - Share the Friendship | Video, Social media | Safarni (an Egyptian initiative which designs and implements innovative intercultural workshops), Egyptian Startup of Bassita (responsible for the clickfunding campaign), Drosos ( Swiss charitable foundation) and IOM | Egypt | <https://www.facebook.com/EgyptianStreets/videos/2430406193850331/> | “Share the Friendship”, a campaign aiming at promoting togetherness between Egyptian children and migrants, is set to lay the first stone towards creating a gracious, nondiscriminant community in Ard Ellewa.  The goal is to enable unprivileged children to experience simulated travel and let them experience imaginary journies to new countries, Safarni will bring children from Ard Ellewa to on-the-ground workshops in order to explore the different cultures of the African migrants in a bid to augment integration and inclusion between the diverse cultures in the district, particularly that they live in close proximity. | universalism / benevolence |
| IoStoConLAccoglienza | Video, Social media | ICS, Fondazione Caritas Trieste, La Collina, Duemilauno agenzia sociale, Lybra, e Acli Trieste. | Italy | <https://www.youtube.com/watch?v=_cSS2TpTsIo> | Many people describe why they are in favour of welcoming migrants and support integration in host countries. | universalism / benevolence |
| Stop Mind Borders | Video, TV, Billboards | IOM Greece, Hellenic Republic | Greece | <https://www.youtube.com/watch?v=D8O24D0Gdwg> | The most dangerous border is what we draw in our minds," is the message of the Stop Mind Borders campaign to address the stereotypes about refugees and immigrants presented by the Minister of Migration Policy and the Head of IOM in Greece | universalism / benevolence |
| #SomosMás | Website, Conferences/Workshops | Spanish Observatory on Racism and Xenophobia (Observatorio Español del Racismo y la Xenofobia - OBERAXE) | Spain | <https://www.somos-mas.es/> | The objective of the campaign #SomosMás is to prevent and raise awareness about hate speech and violent radicalisation. It is divided into 2 main lines of work: Training: workshops aimed at more than 28,000 boys and girls in schools and centers throughout the country that include the development of didactic material and role-playing games to facilitate understanding by students, parents and teachers. Awareness: communication campaign that will include, among other things, collaborations with creators that will help amplify positive messages through their Video as of 2018. | universalism / benevolence |
| Voci di Confine. La Migrazione e' una Bella Storia | Website, Conferences/Workshops | Agenzia Italiana Cooperazione allo Sviluppo, Amref Health Africa, Amref Health Africa in Italia, Associazione Le Réseau, CSV Marche – Centro Servizi per il Volontariato delle Marche, Centro Studi e Ricerche Idos (IDOS), Comitato Permanente per il Partenariato Euromediterraneo (COPPEM), Africa e Mediterraneo, Comune di Lampedusa, Comune di Pesaro, Etnocom, Internationalia, Provincia Autonoma di Bolzano, Regione Puglia, Rete della Diaspora Africana Nera in Italia (REDANI), Step4, Terre des Hommes Italia | Italy | [http://www.vocidiconfine.com/ ; http://www.vocidiconfine.com/](http://www.vocidiconfine.com/http:/www.vocidiconfine.com/) | The campaign will tell stories, data and good territorial practices, demonstrating that the migration phenomenon represents a great opportunity for development and enrichment, both for hosting societies and for migrants. The positive impact that migration is able to have is shown in the campaign through the use of data e successful personal stories. | power, universalism / benevolence |
| Open mosque | Website, Leaflets | Citta' di Torino | Italy | <http://www.comune.torino.it/torinogiovani/vivere-a-torino/moschee-aperte> | The event was born within the framework of the "Sharing Agreement" signed in 2017 by the City of Torino and the Islamic Centres, as an important sign of openness and mutual trust on the part of the Muslim community and the city as a whole, the result of a path of growth and sharing that the City has been promoting for decades. | universalism / benevolence |
| Conta fino a 10 (Count util 10) | Website, Social media | Amnesty International | Italy | <https://www.amnesty.it/campagne/conta-fino-a-10/> | Count to 10" is an awareness campaign on the use of language: on the effects of the use of violent, aggressive and discriminatory speech, and on the awareness that the decrease of the same leads to a more inclusive and welcoming society. | universalism / benevolence |
| Migrants Contribute | Website, Social media | IOM | UK | <http://contribute.migrantsrights.org.uk/> | Migrants Contribute is a campaign that seeks a more truthful portrayal of migrants by stopping the escalating demonisation of migrants in media and political speeches, in order to foster a fairer debate about migration towards the General Elections. | universalism / benevolence |
| L'Italia sono anch'io. Campagna per i diritti di cittadinanza | Website, Video | Acli, Arci, Asgi-Associazione studi giuridici sull’immigrazione, Caritas Italiana, Centro Astalli, Cgil, CISL ANOLF, Cnca-Coordinamento nazionale delle comunità d’accoglienza, Comitato 1° Marzo, Comune di Reggio Emilia, Comunità di Sant'Egidio, Coordinamento Enti Locali Per La Pace, Emmaus Italia, Fcei – Federazione Chiese Evangeliche In Italia, Legambiente, Libera, Lunaria, Fondazione Migrantes, Il Razzismo Brutta Storia, Rete G2 - Seconde Generazioni, Tavola della Pace, Terra del Fuoco, SEI, UIL, UISP e dall’editore Carlo Feltrinelli. | Italy | <http://www.litaliasonoanchio.it/index.php?id=517> | The campaigns aims at pushing institutions to approve a reform of the right of citizenship under which children born in Italy from regular foreign parents can be Italian citizens, as well as a new law granting the administrative electoral right to workers regularly present in Italy for five years. | universalism / benevolence |
| Together | Website, Video | UN | Global | https://www.youtube.com/watch?time_continue=14&v=VQYtzzD6Ox4 ; https://together.un.org/our-aim | The Secretary-General launched the TOGETHER campaign at the UN Summit for Refugees and Migrants on 19 September: All 193 Member States of the United Nations unanimously welcomed the TOGETHER campaign and committed to implementing it. The campaign aims to strengthen the social contract between host countries and communities, and refugees and migrants. | universalism / benevolence |
| #CampagneTamTam | Website, Video, Social media | Multi-organisations (72 different organisations associated to make the campaign) | Belgium | <https://www.campagnetamtam.be/fr-accueil> | #CampagneTamTam aims to explain the neoliberal measures of the present and past Belgian federal governments, to unveil their impacts on citizens and to mobilize around concrete alternatives. The campaign uses Article 23 of the Constitution to put human dignity at the center of the debate on the eve of regional, federal, community and European elections. It was also very active on the question of migration. | universalism / benevolence |
| PIER (Protection, Integration and Education for Refugees) | Website, Video, Social media | Coca Cola Foundations, Caritas, Arsis | Austria, Greece, Italy | <https://www.pier-program.com/> | PIER supports cultural and socio-economic integration of refugees, asylum seekers and migrants in three receiving countries: Austria, Greece and Italy. It encompasses different types of assistance aiming at their improved protection, education and integration, with particular focus on helping children, youth and young adults. | universalism / benevolence |
| WelcHome | Website, Workshops | Comune di Modena Assessorato alla Coesione Sociale, Sanita, Welfare, Integrazione e Cittadinanza | Italy | <https://www.clarinetproject.eu/nominee/welchome/> | WelcHome is a new integration framework for unaccompained foreign minors involving the local community. Family life and contribution of volunteering associations are central to WelcHome strategy. We have met 300+ families for selection, participated to 40+ workshops in schools, organised 4 training workshops in different regions, built a proprietary web platform and most of all successfully assigned 25 minors to family custody. Another great result is the definition of a project management model based on the participation of public institutions, health services and volunteering associations, and their involvement in decision-making processes. | universalism / benevolence |
| Tutti differenti, tutti unici... Insieme contro le discriminazioni (All different, all unique.. Together against discrimination) | Workshops | Minister of Interior; Osservatorio per la Sicurezza Contro gli Atti Discriminatori (OSCAD); Ministry of Education, University and Research (MIUR); Italwork Consorzio | Italy | <https://www.interno.gov.it/it/notizie/tutti-differenti-tutti-unici-insieme-contro-discriminazioni> | The aim of the initiative is to send out a message of legality against discrimination and to spread the culture of reception and inclusion. Each stage will be developed on board a 'branded' truck set up with a multimedia classroom, secondary school students of first and second grade, together with experts from the Postal Police, will talk about discrimination 2.0, involving in a particular way the world of adolescence and analyze the various prejudices of age, gender, ethnicity, sexual orientation, religion, disability in different areas of work, school and sports. | universalism / benevolence |
| A Day Without Migrants | Video | IOM Egypt | Egypt | <https://www.youtube.com/watch?v=DVwrkYnKZT4> | It is a Social media to highlight the real and positive impacts that migrants have on the communities that host them. The campaign seeks also to start dialogue about the impact of migration that is centered on evidence and facts rather than propaganda. It also aims to highlight the importance of migration equally for the benefit of the migrants, the countries of origin and the countries of destination. | universalism / benevolence |
